# Supplementary material for: World pipeline construction to slip for 1994 and beyond
Source: Oxford University Press journal article supplement (doi:10.1242/jeb.115477), 1994-02-07
Supplement: jeb115477supp.pdf [file jeb115477supp.pdf]

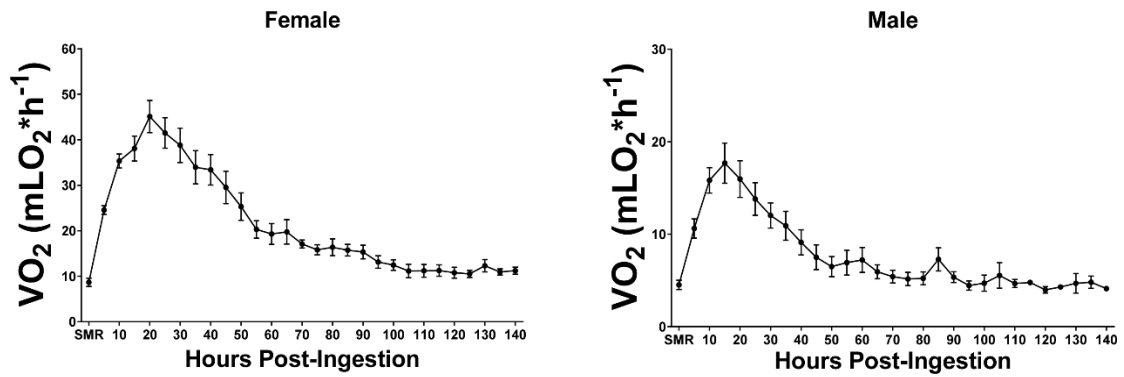

Fig. S1 Specific dynamic action (SDA) curves following the ingestion of a 10% body mass rodent meal in adult male and non-reproductive female *Thamnophis marcianus*. Sample size for both males and females is six individuals. All values represent mean  $\pm$  s.e.m.
